# Supplementary material
Source: PubMed Central journal article supplement (PMC3575716)
Supplement: supp_nsr077_suppl_table.pdf [file supp_nsr077_suppl_table.pdf]

### **Supplementary Table Captions**

Supplementary Table 1. Peak voxels from the Coordinate > Control task contrast (Task-Active areas) and the Control > Coordinate task contrast (Default-Network areas), at  $p < .001$ , cluster size 20.

| <b>Contrast</b>          | <b>Region</b>           | <b>BA</b>             | <b>x</b> | <b>y</b> | <b>z</b> | <b>t</b> |
|--------------------------|-------------------------|-----------------------|----------|----------|----------|----------|
| Coordinate > Control     | L. Sup. Frontal Gyrus   | 6                     | -24      | 0        | 54       | 13.04    |
|                          | R. Sup. Frontal Gyrus   | 6                     | 24       | 3        | 51       | 12.90    |
|                          | L. Supp. Motor Area     | 32                    | -6       | 18       | 48       | 11.01    |
|                          | L. Sup. Parietal Lobule | 7                     | -21      | -63      | 48       | 16.82    |
|                          | R. Sup. Parietal Lobule | 7                     | 33       | -57      | 48       | 20.38    |
|                          | L. Precentral Gyrus     | 44                    | -48      | 6        | 30       | 12.60    |
|                          | R. Precentral Gyrus     | 44                    | 48       | 9        | 27       | 15.90    |
|                          | L. Mid. Frontal Gyrus   | 45                    | -48      | 30       | 30       | 7.14     |
|                          | R. Mid. Frontal Gyrus   | 45                    | 48       | 36       | 24       | 14.22    |
|                          | L. Mid. Frontal Gyrus   | 46                    | -36      | 57       | 12       | 6.70     |
|                          | R. Mid. Frontal Gyrus   | 46                    | 39       | 57       | 0        | 9.30     |
|                          | L. Sup. Occipital Gyrus | 19                    | -24      | -69      | 33       | 14.74    |
|                          | R. Sup. Occipital Gyrus | 19                    | 33       | -69      | 30       | 20.82    |
|                          | L. Mid. Occipital Gyrus | 18                    | -30      | -93      | 6        | 13.50    |
|                          | R. Mid. Occipital Gyrus | 18                    | 36       | -87      | 3        | 17.45    |
|                          | L. Inf. Occipital Gyrus | 19                    | -48      | -72      | -9       | 15.81    |
|                          | R. Inf. Temporal Gyrus  | 37                    | 54       | -57      | -15      | 17.04    |
|                          | L. Insula               | 47                    | -30      | 24       | 0        | 14.28    |
|                          | R. Insula               | 47                    | 30       | 21       | -3       | 13.61    |
|                          | Control > Coordinate    | L. Med. Frontal Gyrus | 11       | -6       | 36       | -12      |
| L. Mid. Cingulate Gyrus  |                         | -                     | -6       | -27      | 45       | 12.93    |
| L. Precuneus             |                         | 23                    | -6       | -54      | 24       | 15.75    |
| L. Angular Gyrus         |                         | 39                    | -45      | -72      | 33       | 16.07    |
| R. Angular Gyrus         |                         | 39                    | 57       | -66      | 24       | 9.74     |
| L. Mid. Frontal Gyrus    |                         | 9                     | -24      | 27       | 45       | 15.62    |
| R. Mid. Frontal Gyrus    |                         | 9                     | 21       | 33       | 42       | 7.11     |
| L. Inf. Frontal Gyrus    |                         | 47                    | -33      | 33       | -12      | 9.13     |
| L. Inf Frontal Gyrus     |                         | 45                    | -48      | 30       | 6        | 6.33     |
| L. Postcentral Gyrus     |                         | 6                     | -48      | -12      | 48       | 10.3     |
| R. Precentral Gyrus      |                         | 6                     | 54       | -6       | 48       | 10.6     |
| L. Hippocampus           |                         | 35                    | -24      | -15      | -21      | 8.97     |
| R. Hippocampus           |                         | 20                    | 27       | -15      | -21      | 9.56     |
| L. Parahippocampal Gyrus |                         | 37                    | -30      | -33      | -15      | 9.75     |
| L. Supramarginal Gyrus   |                         | 48                    | -60      | -30      | 18       | 12.99    |
| R. Supramarginal Gyrus   |                         | 48                    | 48       | -30      | 24       | 10.05    |
| L. Rolandic Operculum    |                         | 48                    | -54      | 0        | 3        | 11.17    |
| R. Rolandic Operculum    |                         | 48                    | 54       | 3        | 3        | 12.60    |
| L. Mid. Temporal Gyrus   |                         | 20                    | -57      | -12      | -15      | 13.10    |
| R. Mid. Temporal Gyrus   |                         | 21                    | 57       | -6       | -18      | 11.44    |
| L. Cuneus                |                         | 18                    | -6       | -90      | 27       | 8.04     |
| R. Cuneus                |                         | 18                    | 12       | -87      | 27       | 7.72     |
| L. Lingual Gyrus         |                         | 18                    | -15      | -63      | -15      | 6.14     |
| R. Lingual Gyrus         |                         | 18                    | 15       | -63      | -12      | 7.60     |

Supplementary Table 1. Peak voxels from the Coordinate > Control task contrast (Task-Active areas) and the Control > Coordinate task contrast (Default-Network areas), at  $p < .001$ , cluster size 10.
